# Supplementary material
Source: MDPI journal article supplement (https://www.mdpi.com/2304-6732/9/8/578)
Supplement: s1 [file s1]

Supplementary information for:

## Exciton transfer dynamics in rubidium-cesium alloyed quasi-two-dimensional perovskite

Lamiaa Abdelrazik <sup>1</sup>, Vidmantas Jašinskas <sup>1</sup>, Žydrūnas Podlipskas <sup>2</sup>, Ramūnas Aleksiejūnas <sup>2</sup>, Gintautas Tamulaitis <sup>2</sup>, Vidmantas Gulbinas <sup>1</sup> and Aurimas Vyšniauskas <sup>1,\*</sup>

<sup>1</sup> Center for Physical Sciences and Technology, Saulėtekio ave. 3, LT-10257 Vilnius, Lithuania;

<sup>2</sup> Institute of Photonics and Nanotechnology, Vilnius University, Saulėtekio ave. 3, LT-10257 Vilnius, Lithuania

\* Correspondence: aurimas.vysniauskas@ftmc.lt

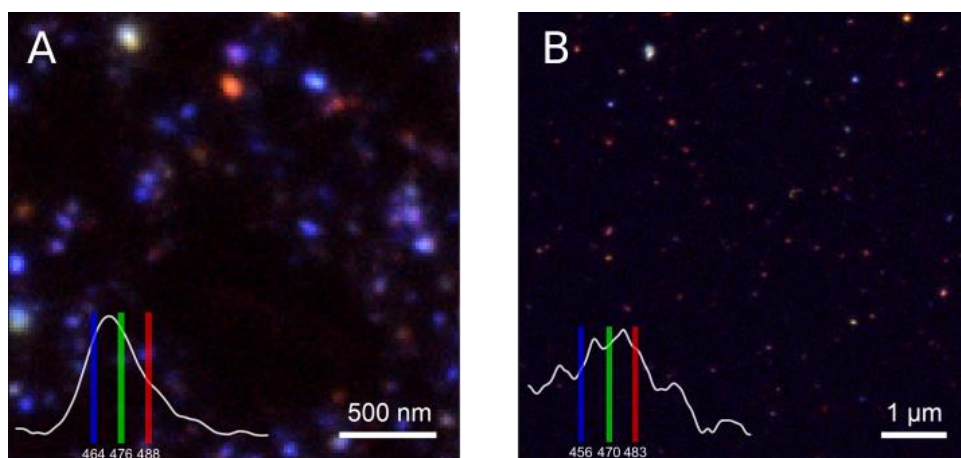

**Figure S1.** Cathodoluminescence images of perovskite films with 50% (A) and 100% (B) excess RbBr. The image is colored in RGB primaries and displayed in its original 128x128 pixel resolution. The insets show cathodoluminescence spectra for the whole image; colored bars show the correspondence between the wavelength and color in the image. The scalebar is shown on the bottom right. The poor signal-to noise ratio in B) is caused by a fast degradation of the sample under imaging conditions.
